# Supplementary material for: Differential Expression of Immunogenic Proteins on VirulentMycobacterium tuberculosisClinical Isolates
Source: Hindawi journal article supplement (doi:10.1155/2014/741309), 2014-01-01
Supplement: f1 [file 741309.f1.pdf]

Supplementary table S1: Primers used in RT-qPCR studies.

| Gene           | Forward primer<br>(5'–3') | Nt position <sup>1</sup> | Reverse primer<br>(5'–3') | Nt position <sup>2</sup> |
|----------------|---------------------------|--------------------------|---------------------------|--------------------------|
| <i>Rv2624</i>  | agccgacgatgaaaacaatc      | 16                       | atgtgtcggcttgatcactg      | 150                      |
| <i>Rv0382c</i> | cgactgggactattcggttg      | 176                      | ccttcgataagtcgctgcat      | 323                      |
| <i>Rv0009</i>  | gacatcaagatcgccctgtt      | 72                       | atgcgtttgggtcgaatag       | 172                      |
| <i>Rv1144</i>  | catcaacctagtcggcacct      | 323                      | aggcggtgtaatgatgacg       | 427                      |
| <i>Rv0407</i>  | ccgtcgaaaaggtaggtcaa      | 877                      | cgactggaagagctccagaa      | 978                      |
| <i>Rv1223</i>  | cgatcaaccacggtaactcc      | 1141                     | gccaccaatttcatctcgtt      | 1283                     |
| <i>Rv2241</i>  | gagcgtggatcagatggaat      | 241                      | gtggttgaaaccgacctcat      | 366                      |

<sup>1</sup> refers to the position in the gene of the 5' base of the forward primer

<sup>2</sup> refers to the position in the gene of the 5' base of the reverse primer

Supplementary table S2: Primers used to amplify the validated genes.

| Gene           | Forward primer (5'–3')    | Reverse primer (5'–3')       |
|----------------|---------------------------|------------------------------|
| <i>Rv2624c</i> | caccatgtctgggagaggagagcc  | tcagcggcgaacgacaagca         |
| <i>Rv0009</i>  | caccatggcagactgtgattccgt  | tcaggagatggtgatcgact         |
| <i>Rv0407</i>  | caccgtggctgaactgaagctagg  | tcagccaagtcgccgcaacc         |
| <i>Rv2241</i>  | ttaggccccgggaccgggatccgtg | caccgtggcgtcgtattgcccgacattg |
| <i>Rv1223</i>  | caccgtggatactagggtggacac  | ctaggtgctatcgggtccg          |

Supplementary table S3: B-cell epitope prediction

| Protein                                                                           | Crystal Structure                                            | 3D Model Template <sup>1</sup>                            | DP <sup>2</sup>     | Figure <sup>3</sup>                                                                   | Predicted Epitope density <sup>4</sup> (pmol/cm <sup>2</sup> ) |
|-----------------------------------------------------------------------------------|--------------------------------------------------------------|-----------------------------------------------------------|---------------------|---------------------------------------------------------------------------------------|----------------------------------------------------------------|
| <b>Rv0009</b><br>Iron-regulated peptidyl-prolyl cis-trans isomerase A <b>PpiA</b> | PDB id: <a href="#">1W74</a><br>Chain: A<br>BU: Monomer      |                                                           | <b>38</b><br>(171)  | 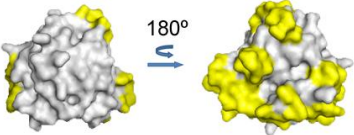   | <b>35±13</b>                                                   |
| <b>Rv0407</b><br>f420-dependent glucose-6-phosphate dehydrogenase                 | PDB id: <a href="#">3B4Y</a><br>Chains: A-B<br>BU: Homodimer |                                                           | <b>28</b><br>(333)  |    | <b>19±7</b>                                                    |
| <b>Rv2241</b><br>Pyruvate dehydrogenase E1 component <b>AceE</b>                  | NA                                                           | PDB id: <a href="#">1L8A</a><br>Chain: A<br>BU: Homodimer | <b>173</b><br>(895) |   | <b>58±22</b>                                                   |
| <b>Rv2624c</b><br>Hypothetical stress protein                                     | NA                                                           | PDB id: <a href="#">1MJH</a><br>Chain: A<br>BU: Homodimer | <b>21</b><br>(279)  |  | <b>16±6</b>                                                    |

<sup>1</sup>For those proteins with no published 3D structures (NA), we performed structure homology modeling using the SWISS-MODEL server, an on-line free-access tool (<http://swissmodel.expasy.org/workspace>). The Protein Data Bank identification (PDB id) of template structure used is indicated.

<sup>2</sup>DiscoTope prediction (DP) were residues with scores >-3,7 determined by DiscoTope 2.0 algorithm. Total # residues on protein 3D structure were indicated between brackets. DiscoTope 2.0 server is a free access prediction tool (<http://www.cbs.dtu.dk/services/DiscoTope-2.0/>).

<sup>3</sup>Predicted discontinuous B cell epitopes were highlighted in yellow on the published or modeled 3D structures. Molecules were depicted using the PyMOL software.

<sup>4</sup>To estimate the predicted surface density of binding sites per ELISA microplate wells, we considered the following parameters: (1) Number of DiscoTope predicted aminoacidic residues per molecule; (2) Mw of Rv protein+ Mw of GST/HIS-tag; (3) Maximal protein binding capacity of Microplate (Corning High Binding Polystyrene)=500 ng/cm<sup>2</sup>; (4) Based on published data, one conformational epitope involve between 8-22 aminoacids (95% CI= 8.6-19). The table informed value is Median±Range. Min and Max range values were calculated by considering 19 and 8.6 aminoacids /epitope, respectively.
